# Supplementary material for: Synthetic lipo-polylysine with anti-cancer activity
Source: Royal Society of Chemistry journal article supplement (doi:10.1039/d3bm01099f), 2023-01-01
Supplement: d3bm01099f1.pdf [file d3bm01099f1.pdf]

## Supporting Information

### Synthetic Lipo-Polylysine with Anti-Cancer Activity

Xuan Yi<sup>a,b</sup>, Pengqi Wan<sup>a,b</sup>, Wei Shen<sup>c</sup>, Xiaonong Zhang<sup>a,b</sup>, Peng Zhang<sup>a,b\*</sup>, and Chunsheng

Xiao<sup>a,b\*</sup>

<sup>a</sup> Key Laboratory of Polymer Ecomaterials, Changchun Institute of Applied Chemistry, Chinese Academy of Sciences, Changchun 130022, P. R. China

<sup>b</sup> Jilin Biomedical Polymers Engineering Laboratory, Changchun 130022, P. R. China

<sup>c</sup> School of Pharmacy, Anhui University of Chinese Medicine, Hefei 230012, P. R. China

\*Corresponding authors

E-mail addresses: peng.zhang@ciac.ac.cn (P. Zhang); xiaocs@ciac.ac.cn (C. Xiao)

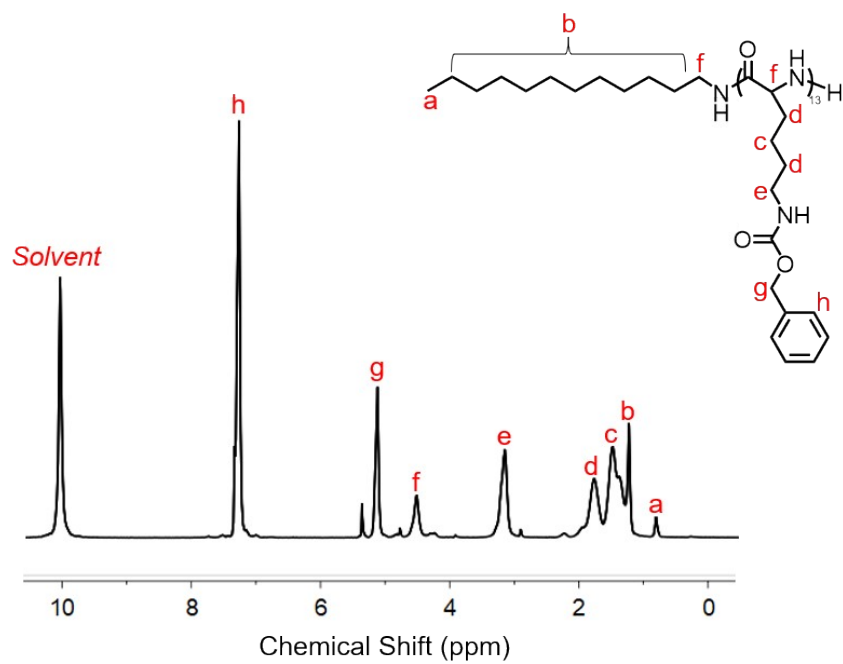

**Fig. S1.** <sup>1</sup>H NMR spectrum of C<sub>12</sub>-PZLL<sub>13</sub> in CF<sub>3</sub>COOD.

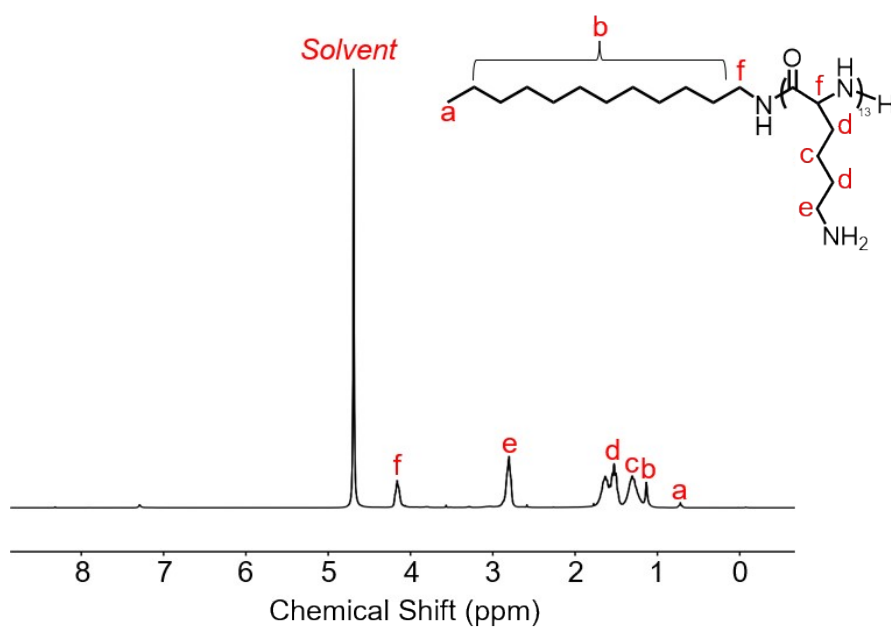

**Fig. S2.** <sup>1</sup>H NMR spectrum of C<sub>12</sub>-PLL<sub>13</sub> in D<sub>2</sub>O.

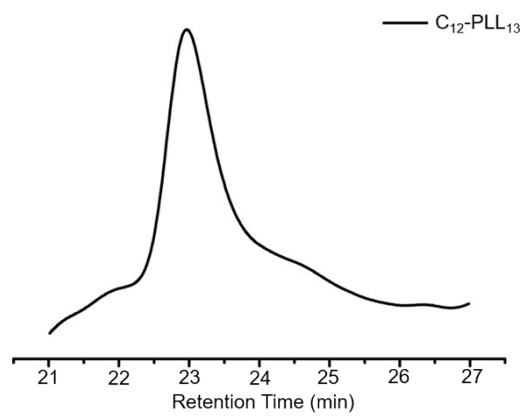

**Fig. S3.** Gel permeation chromatography analysis of C<sub>12</sub>-PLL<sub>13</sub>.

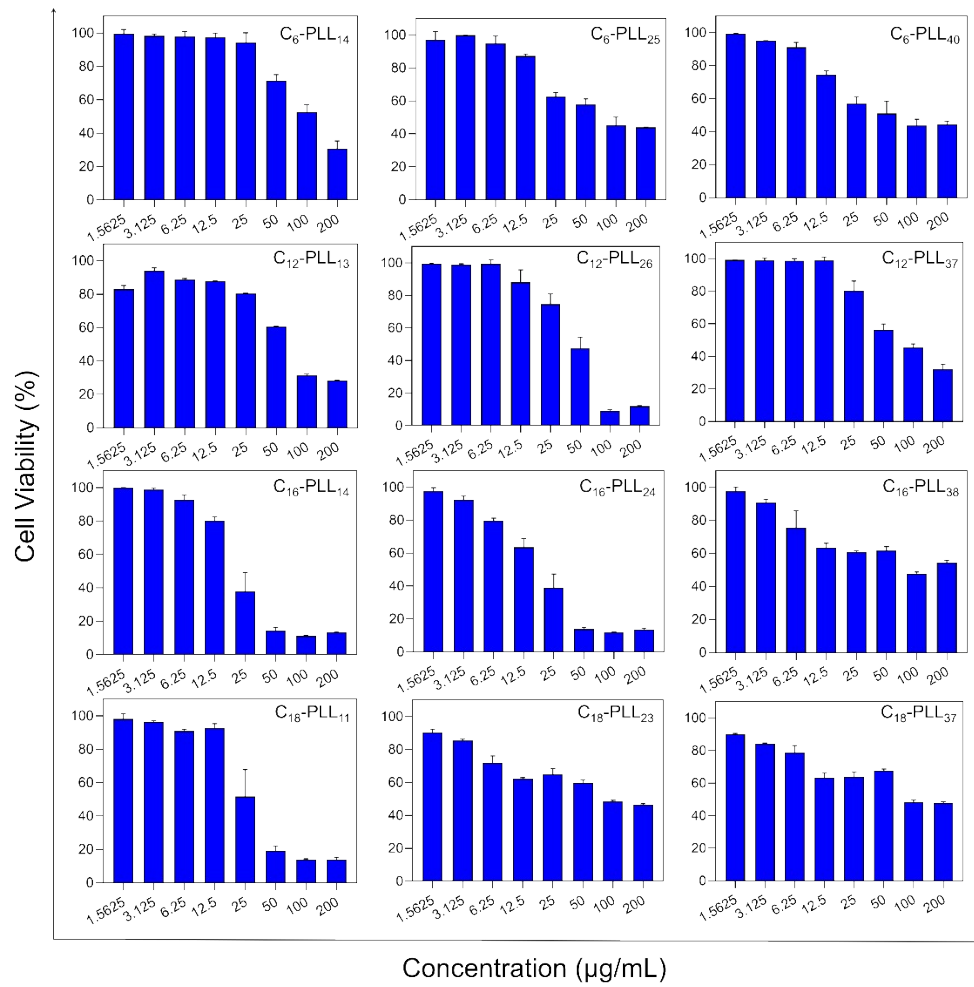

**Fig. S4.** Viability of HUVEC cells after incubation with different concentrations of  $C_m\text{-PLL}_n$  for 24 h. Data are shown as mean  $\pm$  SD (n = 3).

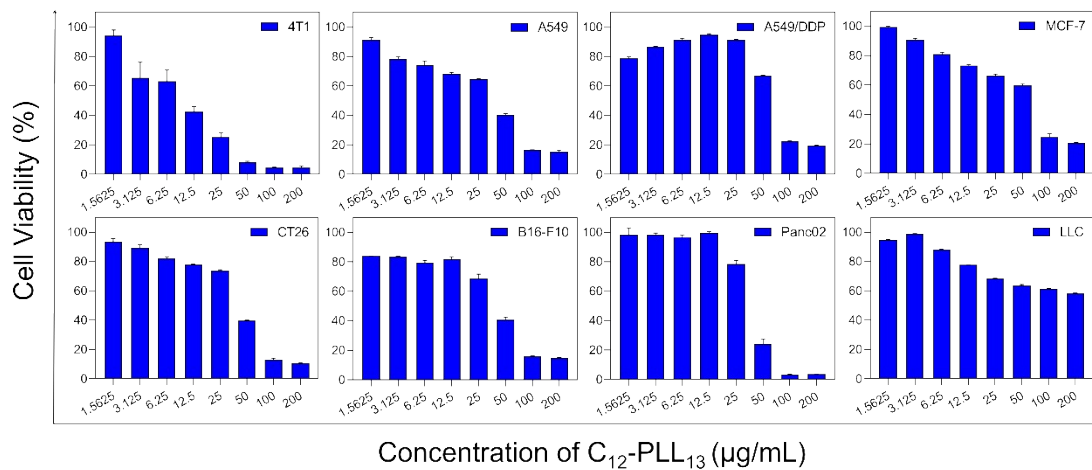

**Fig. S5.** Viability of 4T1, A549, A549/DDP, MCF-7, CT26, B16-F10, Panc02, and LLC cells after incubation with different concentrations of  $C_{12}$ -PLL<sub>13</sub> for 24 h. Data are shown as mean  $\pm$  SD (n = 3).

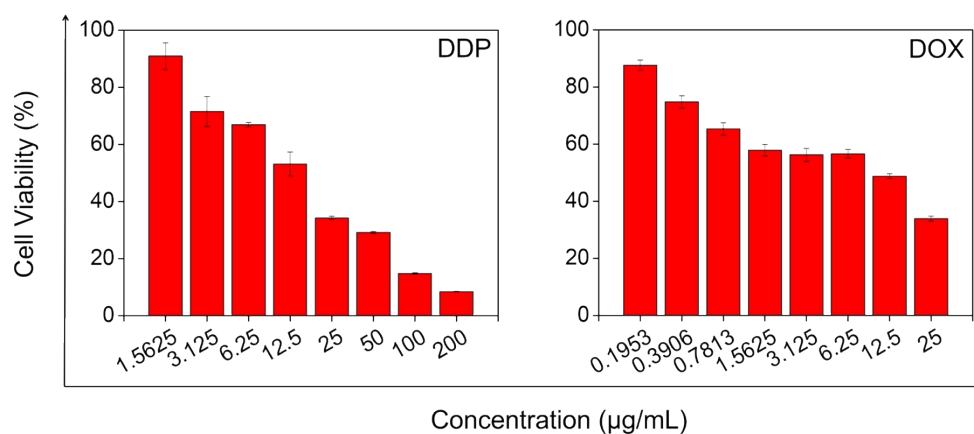

**Fig. S6.** Viability of C26 cells after incubation with different concentrations of cisplatin (DDP), doxorubicin (DOX) for 24 h. Data are shown as mean  $\pm$  SD (n = 3).

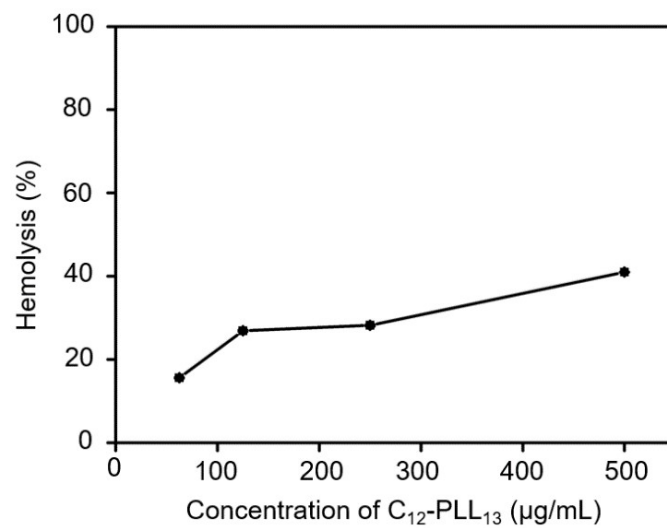

**Fig. S7.** Hemolysis ratio of RBCs treated with C<sub>12</sub>-PLL<sub>13</sub> at different concentrations. Data are shown as mean ± SD (n = 3).



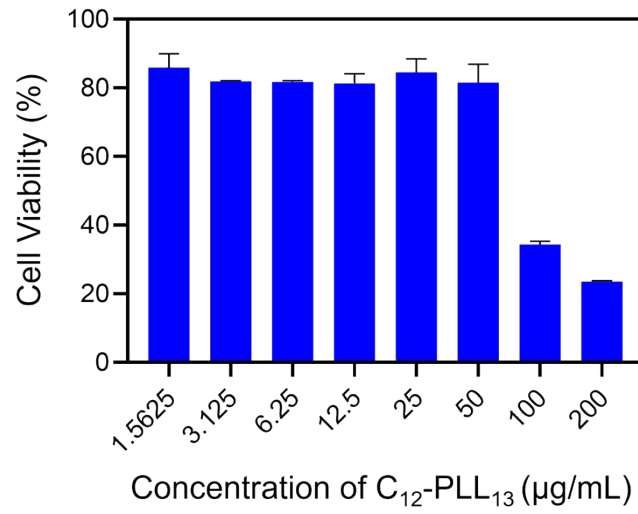

**Fig. S8.** Viability of L929 cells after incubation with different concentrations of C<sub>12</sub>-PLL<sub>13</sub> for 24 h. Data are shown as mean ± SD (n = 3).

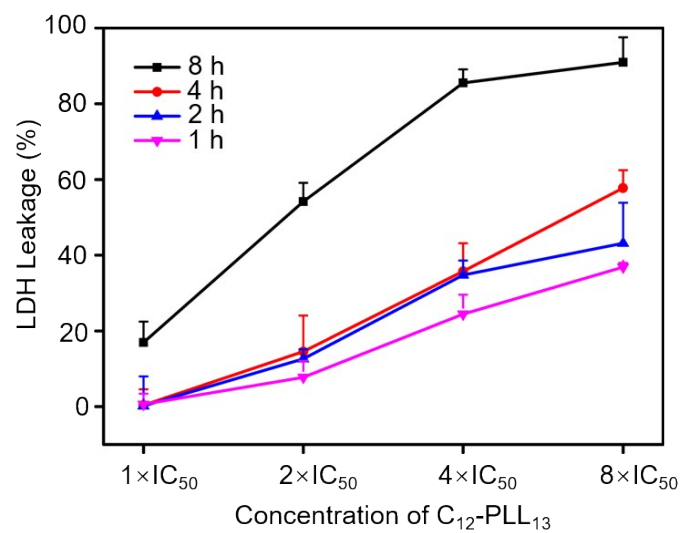

**Fig. S9.** Relative LDH release from the C26 cells treated with C<sub>12</sub>-PLL<sub>13</sub> at different concentrations for 1, 2, 4 or 8 h. Data are shown as mean ± SD (n = 3).

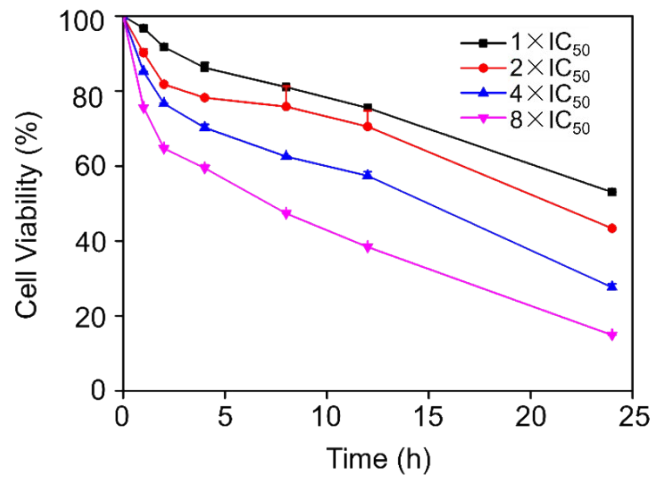

**Fig. S10.** Tumor cell killing kinetics of different concentrations of C<sub>12</sub>-PLL<sub>13</sub> against C26 cells. Data are shown as mean ± SD (n = 3).

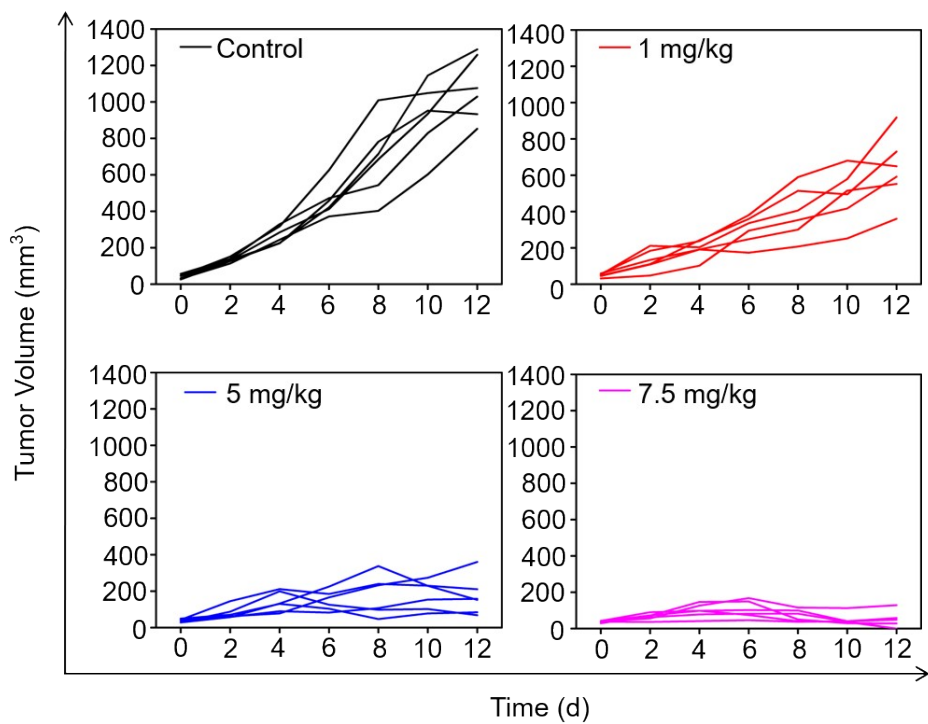

**Fig. S11.** Tumor growth curve of each C26-tumor-bearing mice after treatment with PBS or C<sub>12</sub>-PLL<sub>13</sub> at concentrations of 1 mg/kg, 5 mg/kg and 7.5 mg/kg, respectively.

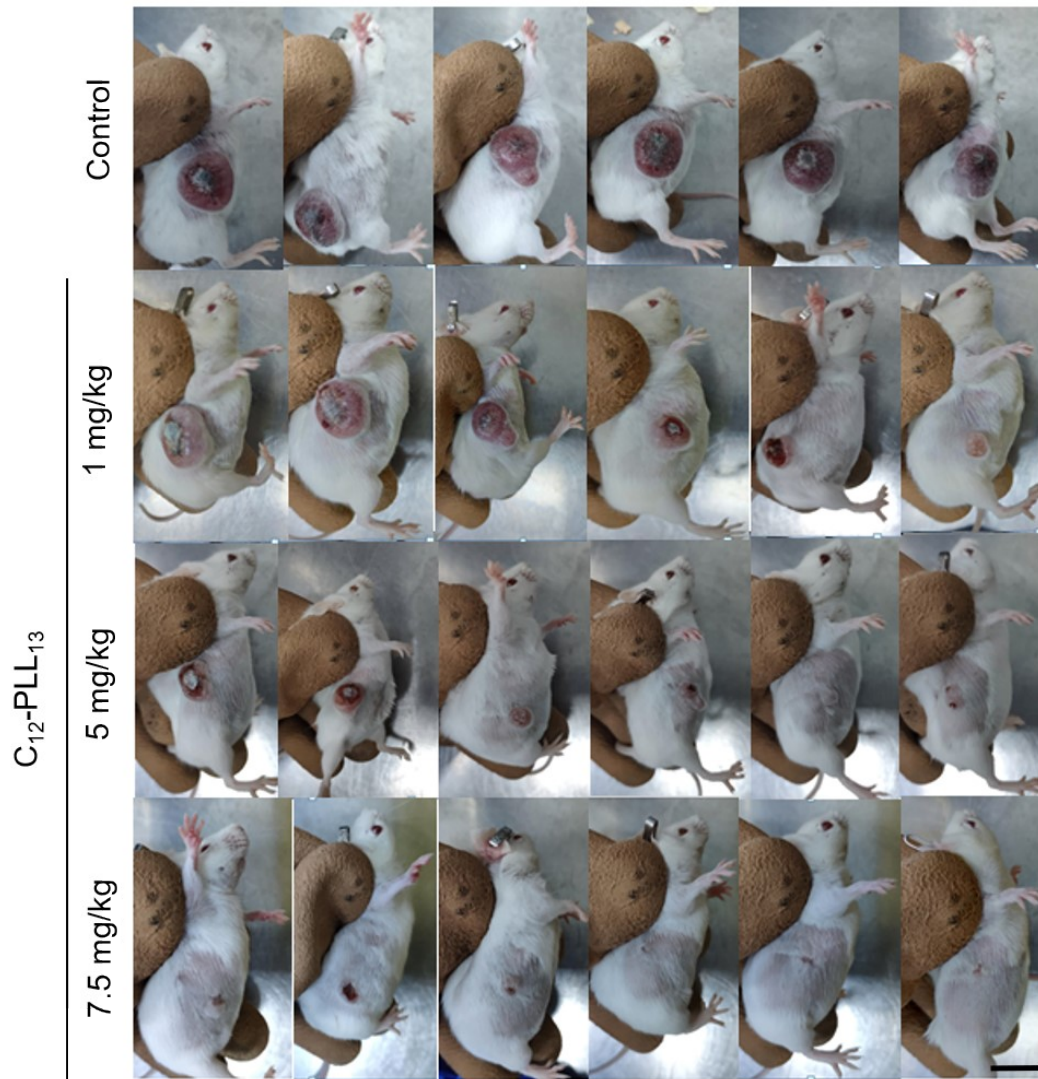

**Fig. S12.** *In vivo* tumor images of C26-tumor-bearing mice after treatment with PBS or different concentrations of C<sub>12</sub>-PLL<sub>13</sub> on day 12. Scale bar = 1 cm.

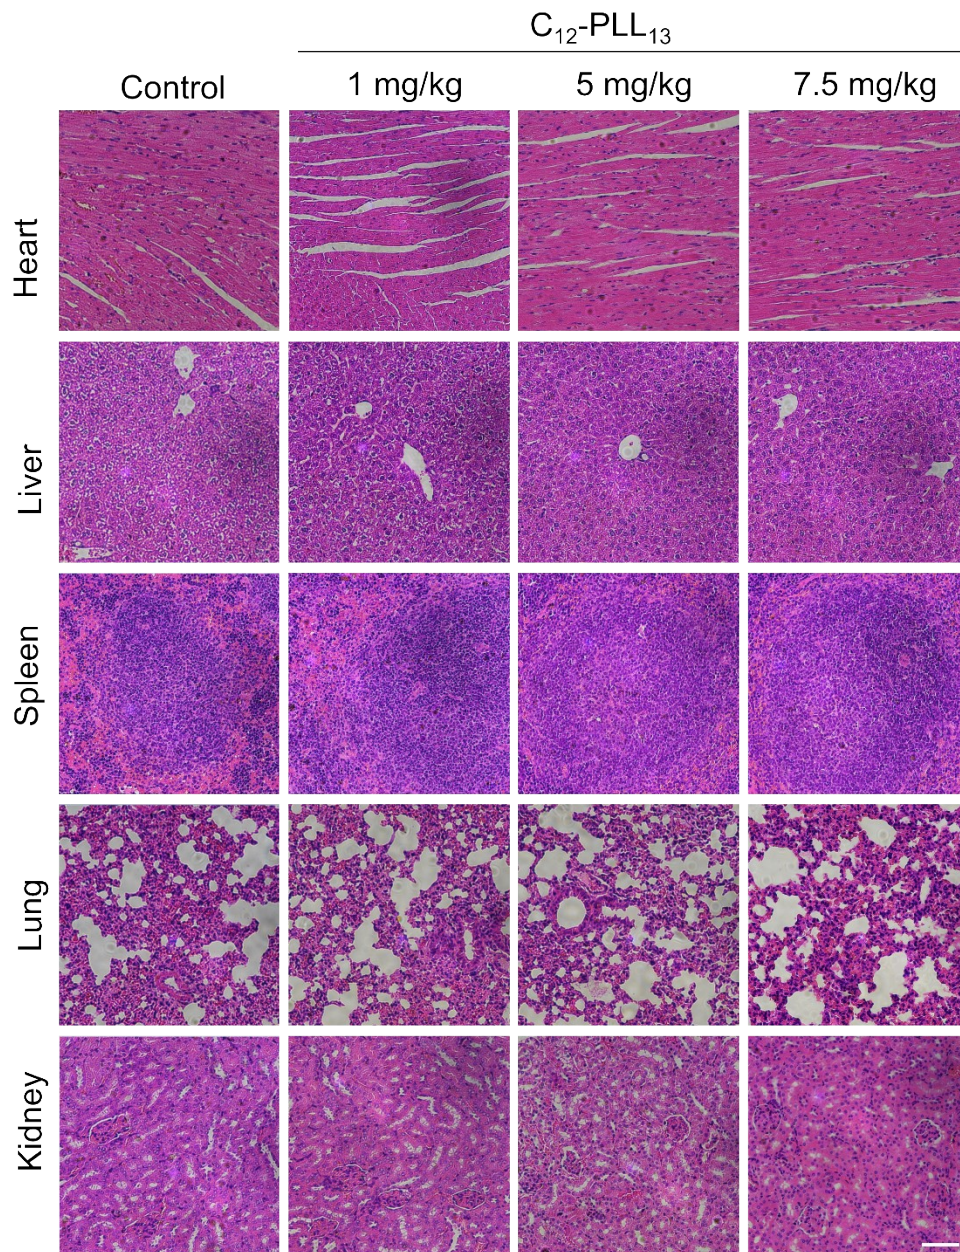

**Fig. S13.** H&E staining analysis of main organs (heart, liver, spleen, lung, and kidney) from the C26-tumor-bearing mice after PBS or C<sub>12</sub>-PLL<sub>13</sub> treatment. Scale bar = 50  $\mu$ m.

**Table S1.** The IC<sub>50</sub> values of C<sub>12</sub>-PLL<sub>13</sub> against various cancer cell lines for 24 h. The unit was set as “μg/mL”.

| Cell lines               | 4T1 | A549 | A549/DDP | MCF-7 | CT26 | B16-F10 | Panc02 | LLC  |
|--------------------------|-----|------|----------|-------|------|---------|--------|------|
| IC <sub>50</sub> (μg/mL) | 10  | 25   | 73       | 45    | 29   | 28      | 32     | >200 |

**Table S2.** The IC<sub>50</sub> values of DDP, DOX, and C<sub>12</sub>.PLL<sub>13</sub> against C26 cell line for 24 h. The molecular weights of DDP, DOX·HCl, and C<sub>12</sub>.PLL<sub>13</sub> were 300, 580, and 2057 g/mol, respectively. The unit was set as “μM”.

| Drugs                 | DDP | DOX | C <sub>12</sub> .PLL <sub>13</sub> |
|-----------------------|-----|-----|------------------------------------|
| IC <sub>50</sub> (μM) | 47  | 12  | 5                                  |
